# Supplementary material
Source: publisher site journal article supplement (https://www.dovepress.com/article/319312)
Supplement: Supplementary file 1 [file get_supplementary_file.php]

**Table S1. Hypermethylated and hypomethylated m5C peaks in mRNAs.**

|  | **Upregulated m5C peaks in mRNAs** | | | | **Downregulated m5C peaks in mRNAs** | |  | **Upregulated m5C peaks in mRNAs** | **Downregulated m5C peaks in mRNAs** |
| --- | --- | --- | --- | --- | --- | --- | --- | --- | --- |
| **Hypermethylated m5C peaks** | **ST8SIA5** | **CD207** | **B3GNT3** | **TUBB8** | **SLC6A2** | **KIAA2012** | **Hypomethylated m5C peaks** | **MAP2K3** | **VIL1** |
| **GRAP2** | **CHAT** | **ZNF365** | **COL10A1** | **SALL1** | **SLC23A1** | **ALOXE3** | **FSD2** |
| **TUBAL3** | **AMPD1** | **MYRF** | **TREM1** | **DEPDC7** | **CNTLN** | **BCAN** | **BAHCC1** |
| **CYP2C19** | **LUZP2** | **DGKI** | **MAJIN** | **FXYD6** | **APOH** | **CYP2S1** | **MARK1** |
| **CD1A** | **ESRRB** | **ANKRD30B** | **XKR4** | **BAHCC1** | **TGM6** | **ITGB4** | **C17orf99** |
| **TNNT3** | **ADCY8** | **CHRDL2** | **PDYN** | **CRYM** | **SLC18A2** | **NECTIN4** | **CALML3** |
| **ALKAL1** | **ZIC3** | **WNT10A** | **ATP10B** | **COL15A1** | **OPRD1** | **SYT8** | **COL2A1** |
| **TRIM72** | **KANK4** | **CD163L1** | **MISP** | **MMP16** | **RDH12** | **WWC1** | **MMP17** |
| **TRIM29** | **GJB7** | **EGFL6** | **FOLR3** | **PAQR8** | **CACNA1S** | **SYNGR4** | **C15orf59** |
| **OR13C4** | **AGBL1** | **FOXI3** | **ALPK2** | **SMAD9** | **ANKRD29** | **ESRRB** | **SIM2** |
| **CACNG4** | **SIRPD** | **SFTPB** | **BICDL2** | **CRHR2** | **MMP17** | **STMN2** | **POTEJ** |
| **KIAA1549L** | **CDH20** | **MOGAT1** |  | **FAM169A** | **DYNC1I1** | **B4GALNT2** | **HS6ST2** |
| **ATP10A** | **NEB** | **ITGA11** |  | **FAM181B** | **FAM189A2** | **SLC30A2** |  |
| **ELOVL7** | **RNF165** | **KCNV1** |  | **KCNJ9** | **RAB30** | **NEB** |  |
| **JPH2** | **PLXNA4** | **ATP12A** |  | **C8orf34** | **PGC** | **FOLR3** |  |
| **ATP2B2** | **IQGAP3** | **LDLRAD1** |  | **HABP2** | **ELF5** |  |  |
| **KCND3** | **SORCS1** | **ANKRD20A4** |  | **FAM92B** | **MLPH** |  |  |
| **ACRBP** | **KRT9** | **GRM4** |  | **VIL1** | **DNAI2** |  |  |
